# Supplementary material for: High-mobility group box 1 increases platelet surface P2Y12 and platelet activation in sickle cell disease.
Source: JCI journal article supplement (doi:10.1172/jci.insight.174575), 2024-03-08
Supplement: sd1 [file 1]

You are being redirected.
